1 **Effect of multiple freeze-thaw cycles on detection of anti-SARS-CoV-2 IgG antibodies**

2 Farah M. Shurrab<sup>1</sup>, Duaa W. Al-Sadeq<sup>1,2</sup>, Fathima Amanullah<sup>1</sup>, Salma N. Younes<sup>1</sup>, Hadeel Al-  
3 Jighefee<sup>1,3</sup>, Nadin Younes<sup>1</sup>, Soha R. Dargham<sup>4,5</sup>, Hadi M. Yassine<sup>1,3</sup>, Laith J. Abu Raddad<sup>6,7,8</sup>,  
4 Gheyath K. Nasrallah<sup>1,3\*</sup>

5  
6 <sup>1</sup> *Biomedical Research Center, Qatar University, Doha 2713, Qatar*

7 <sup>2</sup> *College of Medicine, Member of QU Health, Qatar University, P.O. Box 2713, Doha, Qatar*

8 <sup>3</sup> *Department of Biomedical Science, College of Health Sciences, Member of QU Health, Qatar*  
9 *University, P.O. Box 2713, Doha, Qatar*

10 <sup>4</sup> *Infectious Disease Epidemiology Group, Weill Cornell Medicine □ Qatar, Cornell University,*  
11 *Qatar Foundation – Education City, Doha, Qatar*

12 <sup>5</sup> *World Health Organization Collaborating Centre for Disease Epidemiology Analytics on*  
13 *HIV/AIDS, Sexually Transmitted Infections, and Viral Hepatitis, Weill Cornell Medicine–Qatar,*  
14 *Cornell University, Qatar Foundation – Education City, Doha, Qatar*

15 <sup>6</sup> *Infectious Disease Epidemiology Group, Weill Cornell Medicine □ Qatar, Cornell University,*  
16 *Qatar Foundation – Education City, Doha, Qatar*

17 <sup>7</sup> *World Health Organization Collaborating Centre for Disease Epidemiology Analytics on*  
18 *HIV/AIDS, Sexually Transmitted Infections, and Viral Hepatitis, Weill Cornell Medicine–Qatar,*  
19 *Cornell University, Qatar Foundation – Education City, Doha, Qatar*

20 <sup>8</sup> *Department of Healthcare Policy and Research, Weill Cornell Medicine, Cornell University,*  
21 *New York, United States of America*

22  
23 \* **Correspond to:** Gheyath K. Nasrallah

24 Department of Biomedical Science, College of Health Sciences, Qatar University, Doha 2713, Qatar. Tel:  
25 +974 4403 4817, Email: [gheyath.nasrallah@qu.edu.qa](mailto:gheyath.nasrallah@qu.edu.qa)

26 **Abstract word count:** 187

27 **Manuscript word count:** 1246

28 **Number of references:** 15

29

30 **Abstract:**

31 Several studies have investigated the effect of repeated freeze-thaw (F/T) cycles on RNA  
32 detection for SARS-CoV-2. However, no data is available regarding the effect of repeated F/T  
33 cycles on SARS-CoV-2 antibody detection in serum. We investigated the effect of multiple F/T  
34 cycles on anti-SARS-CoV-2 IgG detection using an ELISA test targeting the nucleocapsid  
35 antibodies. Ten positive and one negative SARS-CoV-2 IgG sera from 11 participants, in  
36 replicates of five were subjected to a total of 16 F/T cycles and stored at 4°C until tested by  
37 ELISA. Statistical analysis was done to test for F/T cycle effect. Non-of the 10 positive sera  
38 turned into negative after 16 F/T cycles. There was no significant difference in the OD average  
39 reading between the first and last F/T cycles, except for one serum with a minimal decline in the  
40 OD. The random-effect linear regression of log (OD) on the number of cycles showed no  
41 significant trend with a slope consistent with zero (B=-0.0001; 95% CI -0.0008; 0.0006; p-  
42 value=0.781). These results suggest that multiple F/T cycles had no effect on the ability of the  
43 ELISA assay to detect the SARS-CoV-2 IgG antibodies.

44 **Keywords:** Antibodies, Detection, COVID-19, SARS-CoV-2, IgG, Freeze, Thaw

45

46 **1. Introduction:**

47 Serum banks are well-established as they are considered an essential reference for clinical  
48 information and research use. However, there are concerns regarding the effect of repeated  
49 freeze-thaw (F/T) cycles on the biological entities of serum proteins, including immunoglobulins  
50 (Ig) (1-4). It is suspected that repeated F/T cycles may lead to denaturation or degradation of the  
51 antibody of interest (5). This is critical when it comes to sensitive immunoassays such as ELISA  
52 or chemiluminescence automated analyzers that detect antibodies in serum or plasma. Therefore,  
53 it is recommended to store sera in aliquots to reduce sample exposure to multiple F/T cycles (6).  
54 Although several studies suggested that repeated F/T cycles have a minimal effect on antibody  
55 stability against specific pathogens (2, 7, 8), other researchers are questioning the reliability of  
56 the data generated from using such samples (9).

57 The emergence of the severe acute respiratory syndrome coronavirus type 2 (SARS-CoV-  
58 2) in late December 2019 in Wuhan, China, has led to a global Coronavirus Disease 2019  
59 (COVID-19) pandemic (10). Several studies showed the effect of repeated F/T cycles on SARS-  
60 CoV-2 RNA stability in the throat and nasopharyngeal swabs specimens (11, 12). However, to  
61 the best of our knowledge, the stability of SARS-CoV-2 antibodies after multiple F/T cycles has  
62 not been assessed. In this study, we investigated the effect of multiple F/T cycles on SARS-CoV-  
63 2 IgG detection in serum by using ELISA targeting the nucleocapsid (N) antibodies.

64 **2. Materials and Methods:**

65 The cohort sera used in this study were part of blood specimens that were collected in a  
66 previous nationwide survey to assess prevalence of SARS-CoV-2 detectable antibodies (13). The  
67 specimens were collected between July 26 and September 9, 2020 and frozen and thawed twice

68 during the previous study before being transferred on ice to our facility at Qatar University,  
69 where they were stored once more at  $-80\text{ C}^{\circ}$  until used in this study, in December of 2020.

70 Fifty sera were screened using the EDI™ novel coronavirus COVID-19 IgG ELISA kit (Ref.  
71 no. KT-1032, USA) targeting the anti-N SARS-CoV2 IgG (14). Eleven sera were selected of  
72 these; of which, 10 were IgG positive and one was IgG negative. The latter serum was used as a  
73 control. For a more representative comparison between measurements, we selected the positive  
74 sera that had broadly different optical density (OD) readings (high, medium, and low).

75 From each of the eleven sera, a total of 40 serum aliquots,  $5\mu\text{l}$  each, were divided into 8 sets  
76 of five replicates and subjected to 8 different freeze-thaw cycles (3, 4, 6, 8, 10, 12, 14, and 16).  
77 The first set was stored at  $4^{\circ}\text{C}$  during the study as a baseline. The remaining 7 sets were  
78 subjected to the repeated freeze-thaw cycles, with one set of aliquots being stored at  $4^{\circ}\text{C}$  at a  
79 time until all cycles were completed. The serum samples were then tested by the EDI kit and the  
80 OD reading at 450 nm was recorded.

81 The average reading of each serum was estimated and plotted against the number of F/T  
82 cycles and versus the cut-off values defining a positive or a negative outcome. The cut offs  
83 values were calculated according to the manufacturer instructions. Independent t-test was  
84 conducted to compare the OD measurements of the positive sera and the negative serum. Paired  
85 t-test were performed to compare the log (OD) of the first cycle to the log (OD) of the last cycle.  
86 To adjust for any clustering effect from measurements of the same serum, a random-effect linear  
87 regression was conducted on the log (OD) versus the number of F/T cycles. A p-value of  $<0.05$   
88 was considered statistically significant.

89 **3. Results:**

90 A total of 438 measurements from 11 sera were available for analysis. Two OD readings  
91 were excluded due to manual error during ELISA run. The mean OD values for the positive  
92 serum measurements [N=398; mean (SD): 0.69 (0.25)] was significantly higher than that of the  
93 negative serum measurement [N=40; mean (SD): 0.23 (0.03); p-value<0.001].

94 The average assay readings for each serum were plotted against the F/T cycles and versus the  
95 cut-off values delineated at  $\leq 0.2655$  for negatives and  $\geq 0.3245$  for positives (Figure 1). When  
96 antibody OD readings were analyzed as categorical outcomes (positive, negative, and equivocal)  
97 across the cycles, out of 398 positive measurements, 0.8% (3/398; 95% CI 0.3%-2.2%) were no  
98 longer classified as positive using the positive cut-off. Instead, there were equivocal. Out of 40  
99 negative measurements, 20.0% (8/40; 95% CI 10.5%-34.8%) were no longer classified as  
100 negative using the negative cut-off (Figure 2). Instead, there were equivocal. None of the sera  
101 changed from positive to negative or from negative to positive throughout the cycles.

102 The random-effect linear regression of  $\log(\text{OD})$  on number of cycles showed no significant  
103 trend with a slope consistent with zero (B=-0.0001; 95% CI -0.0008; 0.0006; P-value=0.781),  
104 indicating that the multiple F/T cycles had no effect on the SARS-CoV-2 IgG antibody titers in  
105 the serum.

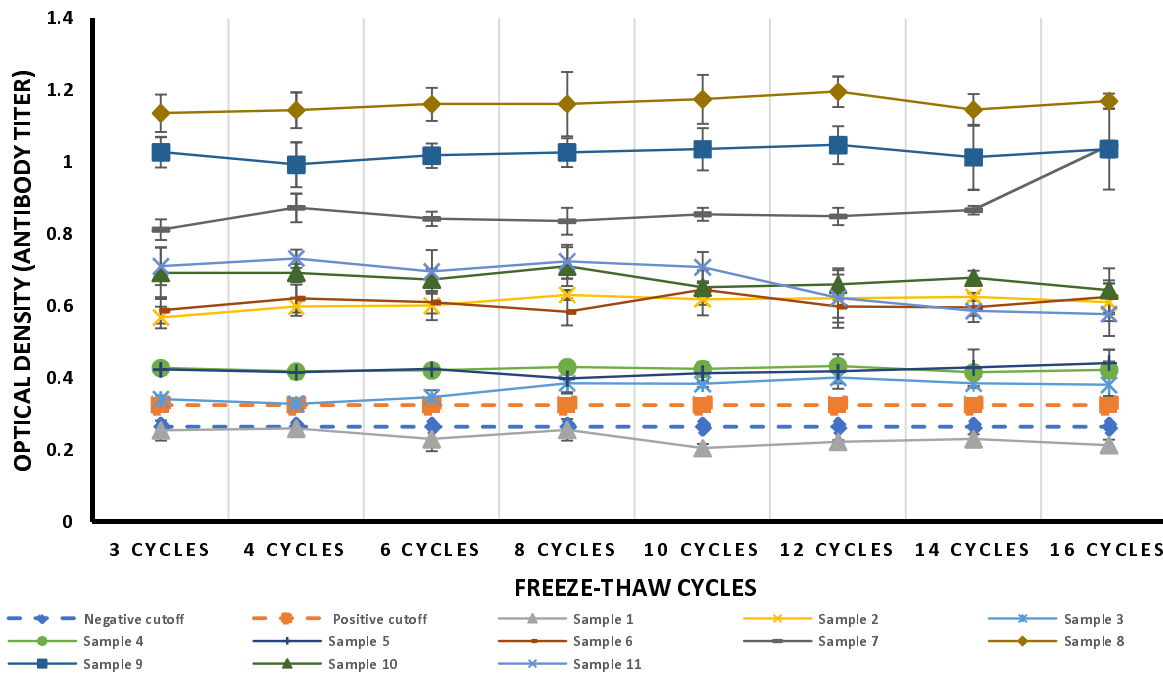

106

107 **Figure 1.** SARS-CoV-2 IgG antibody average 450 optical density readings of the 5 replicates for  
108 each serum plotted against the number of freeze-thaw cycles.

109

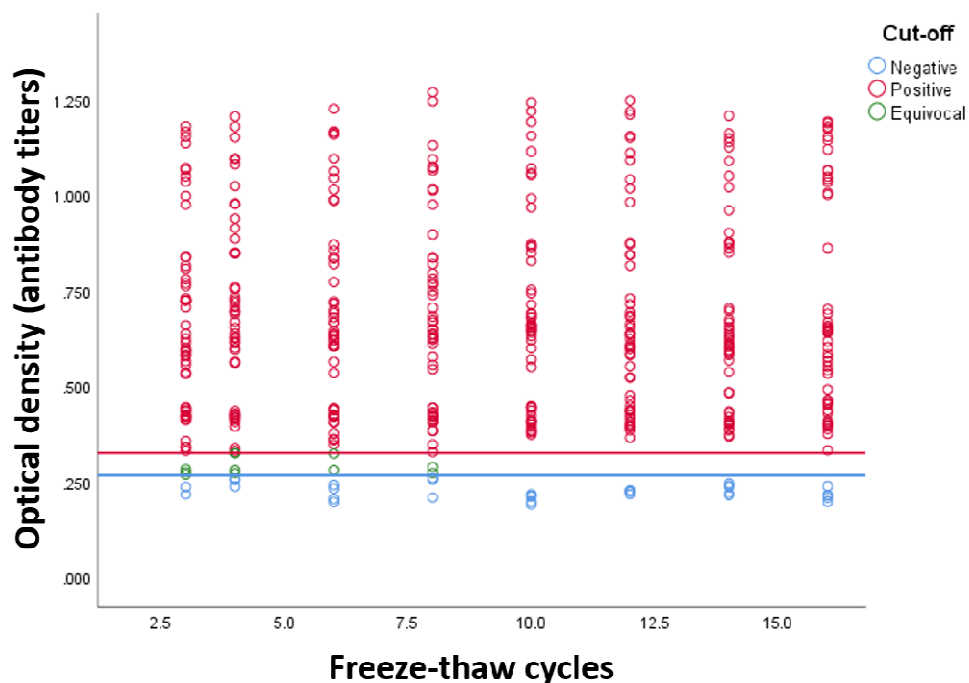

**Figure 2** Antibody levels for SARS-CoV-2 for 438 specimens against the number of freeze-thaw cycles. The blue and red solid horizontal lines delineate the cut-off for negative at optical density 0.2655 and the cut-off for positive at 0.3245.

110 **4. Discussion:**

111 Frozen serum banks are an important source of scientific and clinical information and are  
112 essential to infectious disease and vaccine research. It is commonly believed that antibodies keep  
113 their stability if serum is stored below  $-20\text{C}^{\circ}$  (9). Nevertheless, evidence suggests that just one  
114 F/T cycle can significantly reduce IgG antibody levels (9). To date, studies investigating the  
115 effects of F/T cycles on the detection of SARS-CoV-2 antibodies have yielded inconsistent  
116 results, and the data availability on the effects of multiple F/T cycles, sample size, and storage  
117 conditions, is limiting.

118 The present study investigated the effect of 16 repeated F/T cycles on SARS-CoV-2 IgG  
119 antibodies in serum. The results showed that in nearly all sera there was no significant difference  
120 in sample reactivity between the first and last F/T cycle, and none of the reactive sera became  
121 non-reactive after 16 F/T cycles, or any false-positive results were obtained (Figure 2). The  
122 random effect linear regression showed no significant trend in sera OD reading with a slope that  
123 is consistent with zero. However, there was one outlier with one serum showing an increased OD  
124 reading after cycle 16 (Figure 1, sample no. 7). This outlier may have been caused by a pipetting  
125 error between the ELISA plates.

126 In agreement with our findings, other studies have tested the effect of repeated F/T cycles  
127 on measles, mumps, rubella, syphilis, anti-nuclear antibodies (ANA), and anti-neutrophil  
128 cytoplasmic antibodies (ANCA), and found similar results (2, 8, 15). Although each study  
129 applied a different freeze-thaw methodology and targeted different antigens, they all concluded  
130 that there was no clinically or statistically significant difference in the antibody levels after  
131 several F/T cycles. Interestingly, another study has shown that 174 F/T cycles on anti-treponemal  
132 sera did not affect the stability, the reactivity of antibodies, nor the samples' quality when tested

133 by a chemiluminescence assay (1). The data generated from our study and the previous studies  
134 provide concrete knowledge regarding antibody stability in serum, which allows the maximum  
135 potential use of serum, especially for those that have undergone multiple F/T cycles.  
136 Additionally, our generated results can be beneficial to the design of serum banks, where it is  
137 important to monitor the integrity of sample components.

138 We conclude that 16 F/T cycles did not interfere with the detection of SARS-CoV-2 IgG  
139 antibodies, and with no effect on assay sensitivity. However, in this study, we tested the effect of  
140 multiple F/T cycles on anti-SARS-CoV-2 IgG in serum only. It would be ideal to use plasma  
141 samples as well and to test the stability of other anti-SARS-CoV-2 antibody classes such as IgM  
142 and IgA. Furthermore, our ELISA test targeted antibodies against SARS-CoV-2 nucleocapsid  
143 protein alone, but possibly F/T cycles may interfere with other SARS-CoV-2 proteins, such as  
144 the spike protein. Lastly, using an automated serological analyzer would be beneficial to reduce  
145 pipetting errors.

#### 146 **Author contribution:**

147 Conceptualization: GKN, HMY, LJA; Methodology: FMS, HAJ, DWA, SNY, FHA. Formal  
148 Analysis: SRD, LJA, NY; Validation: GKN, FMS; Investigation: FMS, GKN, SRD, LJA,  
149 Resources: GKN, HMA; Data Curation: GKN, FMS; Writing – Original Draft Preparation: FMS,  
150 GKN, SRD, LJA; Writing, Review & Editing: DWA, HAJ, SRD, GKN, HMY, LJA;  
151 Visualization: GKN, FMS; Supervision: GKN, FMS; Project Administration: GKN, DWA,  
152 Funding Acquisition: GKN, HMY, LJA. All authors have read and agreed to the published  
153 version of the manuscript.

#### 154 **Acknowledgements:**



155 We would like to thank Dr. Nahla Afifi, Director of Qatar Biobank (QBB), Ms. Tasneem Al-  
156 Hamad, Ms. Eiman Al-Khayat and the rest of the QBB team for their unwavering support in  
157 retrieving and analyzing samples and in compiling and generating databases for COVID-19  
158 infection, as well as Dr. Asma Al-Thani, Chairperson of the Qatar Genome Programme  
159 Committee and Board Vice Chairperson of QBB, for her leadership of this effort.

160 **Funding:**

161 This work was made possible by grant No. RRC-2-032 from the Qatar National Research Fund  
162 (a member of Qatar Foundation). The statements made herein are solely the responsibility of the  
163 author(s). GKN acknowledges funds from Qatar University's internal grant QUERG-CMED-  
164 2020-2. SRD and LJA acknowledges the support of the Biomedical Research Program and the  
165 Biostatistics, Epidemiology, and Biomathematics Research Core, both at Weill Cornell  
166 Medicine-Qatar.

167 **Conflict of interest:** The authors declare no conflict of interest.

168 **Ethical statement:** This study was approved by the Medical Research Center (MRC) Ethics  
169 Committee, approval number MRC-05-136, and Qatar University Institutional Review Board  
170 approval number QU-IRB 1492-E/21.

171 **References:**

- 172 1. Castejon MJ, Yamashiro R, Oliveira CC, Oliveira EL, Silveira EP, Oliveira CAFJJBdPeML. Effect of  
173 multiple freeze-thaw cycles on the stability of positive anti-treponemal serum samples. 2017;53(4):246-  
174 51.
- 175 2. Castro AR, Jost HAJStd. Effect of multiple freeze and thaw cycles on the sensitivity of IgG and  
176 IgM immunoglobulins in the sera of patients with syphilis. 2013;40(11):870-1.
- 177 3. Guo GH, Dong J, Yuan XH, Dong ZN, Tian YPJMmr. Clinical evaluation of the levels of 12  
178 cytokines in serum/plasma under various storage conditions using evidence biochip arrays.  
179 2013;7(3):775-80.
- 180 4. Cuhadar S, Koseoglu M, Atay A, Dirican AJBmBm. The effect of storage time and freeze-thaw  
181 cycles on the stability of serum samples. 2013;23(1):70-7.
- 182 5. Miller MA, Rodrigues MA, Glass MA, Singh SK, Johnston KP, Maynard JAJJops. Frozen-state  
183 storage stability of a monoclonal antibody: aggregation is impacted by freezing rate and solute  
184 distribution. 2013;102(4):1194-208.
- 185 6. Paltiel L, Rønningen KS, Meltzer HM, Baker SV, Hoppin JAJCpt. Evaluation of freeze-thaw cycles  
186 on stored plasma in the biobank of the Norwegian Mother and Child Cohort study. 2008;6(3):223-9.
- 187 7. Maelegheer K, Devreese KMJR, thrombosis pi, haemostasis. The impact of repeated freeze-thaw  
188 cycles on antiphospholipid antibody titer. 2018;2(2):366-9.
- 189 8. Pinsky NA, Huddleston JM, Jacobson RM, Wollan PC, Poland GAJC, immunology dl. Effect of  
190 multiple freeze-thaw cycles on detection of measles, mumps, and rubella virus antibodies.  
191 2003;10(1):19-21.
- 192 9. Petrakis NL. Biologic banking in cohort studies, with special reference to blood. National Cancer  
193 Institute monograph. 1985;67:193-8.
- 194 10. Younes S, Younes N, Shurrab F, Nasrallah GKJRimv. Severe acute respiratory syndrome  
195 coronavirus-2 natural animal reservoirs and experimental models: systematic review. 2020:e2196.
- 196 11. Li L, Li X, Guo Z, Wang Z, Zhang K, Li C, et al. Influence of storage conditions on SARS-CoV-2  
197 nucleic acid detection in throat swabs. 2020.
- 198 12. Stohr JJ, Wennekes M, van der Ent M, Diederer BM, Kluytmans-van den Bergh MF, Bergmans  
199 AM, et al. Clinical performance and sample freeze-thaw stability of the cobas® 6800 SARS-CoV-2 assay  
200 for the detection of SARS-CoV-2 in oro-/nasopharyngeal swabs and lower respiratory specimens.  
201 2020:104686.
- 202 13. Al-Thani MH, Farag E, Bertollini R, Al Romaihi HE, Abdeen S, Abdelkarim A, et al. Seroprevalence  
203 of SARS-CoV-2 infection in the craft and manual worker population of Qatar. medRxiv.  
204 2020:2020.11.24.20237719.
- 205 14. Yassine HM, Al-Jighefee H, Al-Sadeq DW, Dargham SR, Younes SN, Shurrab F, et al. Performance  
206 evaluation of five ELISA kits for detecting anti-SARS-COV-2 IgG antibodies. 2020;102:181-7.
- 207 15. Demir M, Cevahir N. Does multiple freezing and thawing cycles of serum affect the detection of  
208 anti-nuclear antibodies and anti-neutrophil cytoplasmic antibodies by indirect immunofluorescent  
209 method? 2014.
